# Supplementary material for: Insights into the evolution of chemical structure and pyrolysis reactivity of PVC-derived hydrochar during hydrothermal carbonization
Source: Royal Society of Chemistry journal article supplement (doi:10.1039/d3ra04986h), 2023-01-01

## Supplementary materials for

### Insights into the evolution of chemical structure and pyrolysis reactivity of PVC-derived hydrochar during hydrothermal carbonization

Ling Zhang <sup>a,b</sup>, Qing Wang <sup>a,\*</sup>, Faxing Xu <sup>c</sup>, Zhenye Wang <sup>c</sup>

<sup>a</sup>Engineering Research Centre of Oil Shale Comprehensive Utilization, Ministry of Education, Northeast Electric Power University, Jilin City, Jilin, 132012, PR China

<sup>b</sup>Jilin Institute of Chemical Technology, Jilin City, Jilin, 132022, PR China

<sup>c</sup>Jilin Feite Environmental Protection Co. Ltd, Jilin Key Laboratory of Subcritical Hydrolysis Technology, Jilin, 132200, PR China

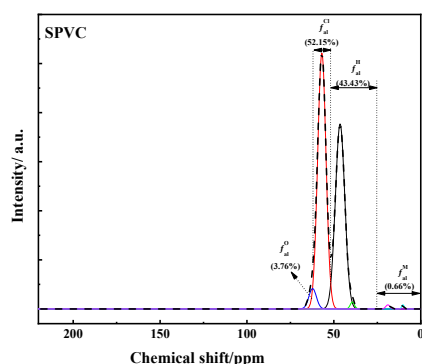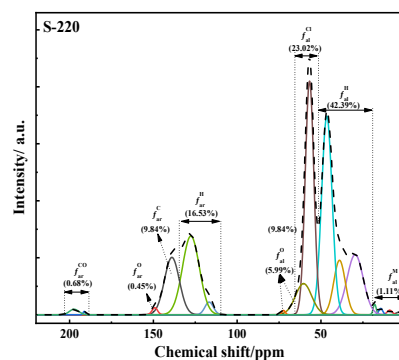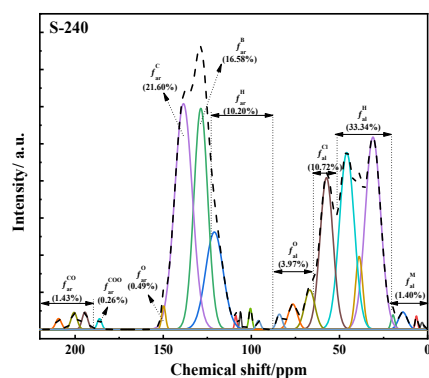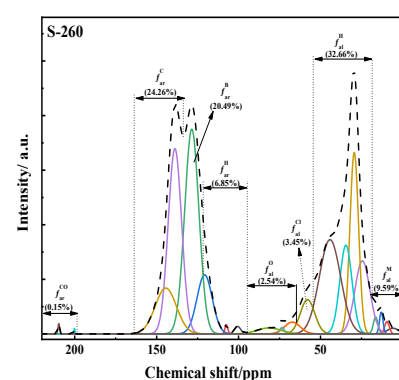

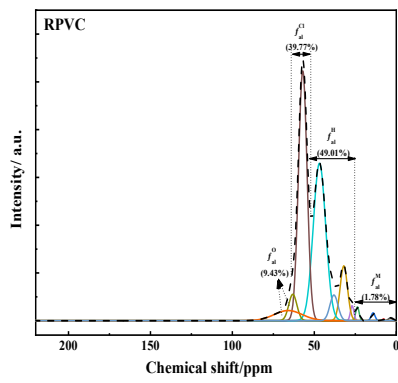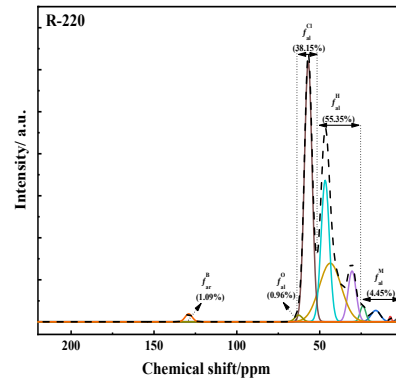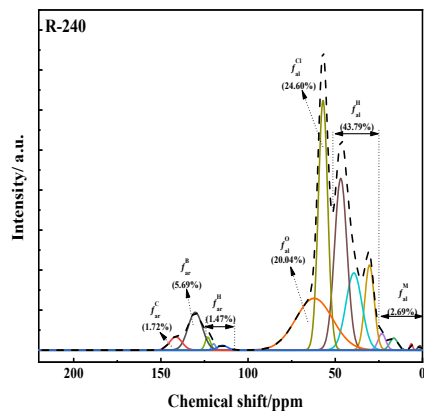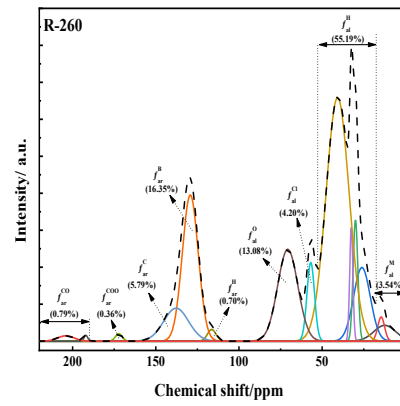

Supplement: d3ra04986h1.pdf [file d3ra04986h1.pdf]
